# Supplementary material for: Fragaria × ananassa cv. Senga Sengana Leaf: An Agricultural Waste with Antiglycation Potential and High Content of Ellagitannins, Flavonols, and 2-Pyrone-4,6-dicarboxylic Acid
Source: MDPI journal article supplement (doi:10.3390/molecules27165293), 2022-08-19
Supplement: s1 [file s1]

# ***Fragaria × ananassa* cv. Senga Sengana leaf: An agricultural waste with antiglycation potential and high content of ellagitannins, flavonols, and 2-pyrone-4,6-dicarboxylic acid**

Izabela Fecka <sup>1</sup>, Katarzyna Bednarska <sup>1</sup> and Maciej Włodarczyk <sup>1,\*</sup>

<sup>1</sup> Department of Pharmacognosy and Herbal Medicines, Faculty of Pharmacy, Wrocław Medical University, Borowska 211a, 50-556 Wrocław, Poland

\* Correspondence: maciej.wlodarczyk@umw.edu.pl; Tel.: +48-71-78-40-223

## **A. NMR data for compounds 1, 3, 4a, 5, 8-14:**

**Rosaceae 2-pyrone-4,6-dicarboxylic acid (PDC, 1)**, creamy powder; <sup>1</sup>H-NMR (300 MHz, CD<sub>3</sub>OD): δ 7.43 (1H, d, J=1.5 Hz, H-3), 6.75 (1H, d, J=1.5 Hz, H-5). <sup>13</sup>C-NMR (75 MHz, CD<sub>3</sub>OD): δ 162.20 (s, C-2), 107.81 (s, C-3), 155.28 (s, C-6), 168.73 (s, C-7); 163.89 (s, C-8).

**3-O-Galloylquinic acid (3-GQA, 3)**, light beige powder; <sup>1</sup>H-NMR (300 MHz, CD<sub>3</sub>OD): δ 7.07 (s, 2H, H-2' & H-6'), 5.31 (m, 1H, H-3), 4.10 (m, 1H, H-5), 3.63-3.49 (m, 1H, H-4), 2.13+1.86 (m, 4H, H-2 & H-6); <sup>13</sup>C NMR (75 MHz, CD<sub>3</sub>OD): δ 167.47 (C-7'), 146.19 (C-3' & C-5'), 139.79 (C-4'), 109.92 (C-2' & C-6'), 121.20 (C-1'), 76.00 (C-1), 72.25 (C-3), 71.55 (C-5), 64.20 (C-4), 42.02 (C-2 & C-6).

**Protocatechuoyl xylose (4a)**, white amorphous powder; <sup>1</sup>H NMR (300 MHz, DMSO-*d*<sub>6</sub>) δ 7.37 (1H, d, J=3.1 Hz, H-2), 6.86 (1H, dd, J=8.7, 3.1 Hz, H-6), 6.56 (1H, d, J=8.7 Hz, H-5), 4.57 (1H, d, J=7.1 Hz, H-1'), 3.73 (1H, dd, J=11.2, 5.1 Hz, 1H, H-5'a), 3.34 (1H, d, J=10.6 Hz, H-4'), 3.18 (2H, m, H-2' & H-3'), 3.12 (1H, t, J=11.3 Hz, H-5'b); <sup>13</sup>C NMR (75 MHz, DMSO-*d*<sub>6</sub>) δ 171.38 (C-7), 157.66 (C-4), 147.99 (C-3), 121.52 (C-6), 120.31 (C-1), 118.30 (C-2), 115.81 (C-5), 103.12 (C-1'), 76.48 (C-3'), 73.20 (C-2'), 69.46 (C-4'), 65.68 (C-5').

**5-O-Galloylquinic acid (5-GQA, 5)**, light beige powder; <sup>1</sup>H-NMR (300 MHz, CD<sub>3</sub>OD): δ 7.02 (s, 2H, H-2' & H-6'), 5.39 (m, 1H, H-5), 4.19 (m, 1H, H-3), 3.86-3.75 (m, 1H, H-4), 2.22+2.05 (m, 4H, H-2 & H-6); <sup>13</sup>C-NMR (75 MHz, CD<sub>3</sub>OD): δ 175.27 (C-7), 167.69 (C-7'), 146.27 (C-3' & C-5'), 139.72 (C-4'), 110.05 (C-2' & C-6'), 121.49 (C-1'), 76.00 (C-1), 71.98 (C-5), 70.67 (C-3), 61.82 (C-4), 38.11 (C-2 & C-6).

**(2R,3R)-taxifolin-3-O-β-glucoside (8)**, brown powder; <sup>1</sup>H-NMR (300 MHz, CD<sub>3</sub>OD): δ 6.95 (1H, d, J=2.0 Hz; H-2'), 6.91 (1H, s; H-6), 6.90 (1H, s; H-8), 6.83 (1H, dd, J=2.8, 8.1 Hz; H-6'), 6.78 (1H, d, J=8.1 Hz; H-5'), 5.24 (1H, d, J=9.8 Hz; H-2), 4.92 (1H, d, J=9.8 Hz; H-3).

**Quercetin-3-O-β-glucuronoside-7-O-β-glucoside (9)**, yellow powder; <sup>1</sup>H-NMR (300 MHz, DMSO-*d*<sub>6</sub>): δ 7.61 (1H, d, J=1.7 Hz; H-2'), 7.58 (1H, dd, J=8.3, 2.0 Hz; H-6'), 6.85 (1H, d, J=8.5 Hz; H-5'), 6.76 (1H, d, J=2.1 Hz; H-8), 6.45 (1H, d, J=2.1 Hz; H-6), 5.50 (1H, d, J=7.0 Hz; H-1''), 5.09 (1H, d, J=7.2 Hz; H-1'''), 3.44 (m; H-5'''), 3.29 (m; H-3'''), 3.29 (m; H-3''), 3.57 (m; H-5''), 3.29 (m; H-2''), 3.29 (m; H-2'''), 3.39 (m; H-4''), 3.18 (m; H-4'''), 3.70 (m; H-6'''a), 3.47 (m; H-6'''b); <sup>13</sup>C NMR (75 MHz, DMSO-*d*<sub>6</sub>) δ 177.36 (C-4), 170.33 (C-6''), 162.93 (C-7), 160.81 (C-5), 158.35 (C-9), 155.91 (C-2), 148.8 (C-4'), 144.93 (C-3'), 133.38 (C-3), 121.72 (C-6'), 120.72 (C-1'), 116.39 (C-2'), 115.19 (C-5'), 105.52 (C-10), 101.07 (C-1''), 99.79 (C-1'''), 99.42 (C-6), 94.49 (C-8), 77.17 (C-5'''), 76.4 (C-3'''), 75.9 (C-3''), 75.9 (C-5''), 73.78 (C-2''), 73.11 (C-2'''), 71.34 (C-4''), 69.55 (C-4'''), 60.61 (C-6'').

**Agrimoniin (10)**, yellow amorphous powder;  $^1\text{H}$  NMR (500 MHz, acetone- $d_6$ +D $_2$ O, 1:1):  $\delta$  7.31 (1H, d,  $J=2.0$  Hz), 7.17 (1H, s) (DHDG/m-GOG), 6.62, 6.60, 6.53, 6.47, 6.45, 6.31, 6.29, 6.28 (1H each, s) (4  $\times$  HHDP), 6.49, 6.42 (1H each, d,  $J=3.5$  Hz) (anomers  $\alpha$ -Glc $p$ 1 and  $\alpha$ -Glc $p$ 2, H-1,1'), 5.39, 5.28 (1H each, t,  $J=9.5$  Hz, Glc $p$  H-3,3'), 5.26, 5.22 (1H each, dd, Glc $p$  H-2,2'), 5.14, 4.86 (1H each, t,  $J=13.2$  Hz, Glc $p$  H-6,2,6'), 5.02, 4.93 (1H, t,  $J=9.5$  Hz, Glc $p$  H-4,4'), 4.50, 3.88 (1H, dd,  $J=9.5$ , 6.3 Hz, Glc $p$  H-5,5'), 3.75, 3.40 (1H, d,  $J=13.2$  Hz, Glc $p$  H-6,1,6');  $^{13}\text{C}$  NMR (125 MHz, acetone- $d_6$ +D $_2$ O, 1:1):  $\delta$  169.78, 169.54, 169.45, 168.98, 168.68, 168.35, 168.29, 165.56, 164.59, 164.19 (10  $\times$  – COOR), 147.42, 146.27 (1C each), 144.84, 144.75, 144.12, 144.01, 143.79, (3C each), 142.98 (2C), 140.90, 140.18, 139.29 (1C each), 136.58, 136.38, 136.34 (1C each), 136.14-135.94 (6C), 125.68, 125.52, 125.58, 125.42, 125.29, 125.21, 124.91, 124.68, 124.03 (1C each), 119.34, 115.64, 115.35, 115.23, 114.99, 114.18, 114.16, 114.13, 113.93, 113.91, 112.06, 109.70, 108.43, 107.90, 107.85, 107.62, 107.55, 107.15, 106.90, 106.72 (total 60C, DHDG/m-GOG & 4  $\times$  HHDP), 90.79 (Glc $p$  C-1), 90.44 (Glc $p$  C-1'), 75.32 (2C, Glc $p$  C-3 & 3'), 73.72 (Glc $p$  C-2), 73.62 (Glc $p$  C-2'), 70.61 (Glc $p$  C-5), 70.40 (Glc $p$  C-5'), 68.79 (Glc $p$  C-4), 68.45 (Glc $p$  C-4'), 63.06 (Glc $p$  C-6), 63.01 (Glc $p$  C-6').

**Quercetin-3-O-[ $\beta$ -xylosyl(1 $'''$ →2 $''$ )]- $\beta$ -glucuronoside (flagarin, 11)**, data consistent with (Abe et al., 2018). Yellow amorphous powder;  $^1\text{H}$  NMR (300 MHz, DMSO- $d_6$ ):  $\delta$  7.71 (1H, d,  $J=2.2$  Hz, H-6'), 7.59 (1H, d,  $J=8.3$ , 2.1 Hz H-2'), 6.83 (1H, d,  $J=8.6$  Hz, H-5'), 6.37 (1H, d,  $J=2.0$  Hz, H-8), 6.16 (1H, d,  $J=2.0$  Hz, H-6), 5.70 (1H, d,  $J=7.6$  Hz, H-1''), 4.58 (1H, d,  $J=6.9$  Hz, H-1'''), 3.67 (H-5''a), 3.51 (H-2''), 3.33 (H-2'''), 3.02 (H-5''b); other sugar's protons visible as multiplet;  $^{13}\text{C}$  NMR (75 MHz, DMSO- $d_6$ )  $\delta$  177.43 (C-4), 171.46 (C-6''), 164.21 (C-7), 161.20 (C-5), 160.03 (C-2), 157.15 (C-9), 148.58 (C-4'), 144.90 (C-3'), 133.27 (C-3), 121.87 (C-1'), 121.43 (C-6'), 116.43 (C-2'), 115.13 (C-5'), 104.29 (C-1'''), 103.81 (C-10), 98.48 (C-6), 98.15 (C-1''), 93.31 (C-8), 81.37 (C-2''), 76.49\* (C-4''), 76.45\* (C-3''), 76.26\* (C-3'''), 74.30 (C-2'''), 73.38 (C-5''), 71.43 (C-4'''), 65.25 (C-5'''). \*overlapping shifts can be exchanged.

**Quercetin-3-O- $\beta$ -glucuronoside (12)**, data consistent with (Ossipov et al., 1995). Yellow crystalline powder;  $^1\text{H}$  NMR (300 MHz, DMSO- $d_6$ ):  $\delta$  7.61 (1H, d,  $J=2.1$  Hz, H-2'), 7.57 (1H, dd,  $J=8.3$ , 2.1 Hz H-6'), 6.84 (1H, d,  $J=8.3$  Hz, H-5'), 6.41 (1H, d,  $J=2.0$  Hz, H-8), 6.21 (1H, d,  $J=2.0$  Hz, H-6), 5.49 (1H, d,  $J=7.3$  Hz, H-1''), 3.28 (m; H-3''), 3.57 (d,  $J=9.5$  Hz, 1H; H-5''), 3.29 (m; H-2''), 3.38 (m; H-4'');  $^{13}\text{C}$  NMR (75 MHz, DMSO- $d_6$ )  $\delta$  177.36 (C-4), 169.86 (C-6''), 164.41 (C-7), 161.26 (C-5), 156.33 (C-9), 156.22 (C-2), 148.71 (C-4'), 145.04 (C-3'), 133.04 (C-3), 121.8 (C-6'), 120.95 (C-1'), 116.77 (C-2'), 116.3 (C-5'), 103.96 (C-10), 101.29 (C-1''), 98.9 (C-6), 93.7 (C-8), 75.96 (C-3''), 75.43 (C-5''), 74.1 (C-2''), 71.39 (C-4'').

**Kaempferol-3-O-[ $\beta$ -xylosyl(1 $'''$ →2 $''$ )]- $\beta$ -glucuronoside (13)**, previously unreported, data compared with (Abe et al., 2018). Yellowish crystalline powder.  $^1\text{H}$  NMR (300 MHz, DMSO- $d_6$ )  $\delta$  8.07 (2H, d,  $J=8.9$  Hz, H-2' & H-6'), 6.88 (2H, d,  $J=8.6$  Hz, H-3' & H-5'), 6.37 (1H, d,  $J=2.1$  Hz, H-8), 6.14 (1H, d,  $J=2.1$  Hz, H-6), 5.73 (1H, d,  $J=7.3$  Hz, H-1''), 4.61 (1H, d,  $J=6.9$  Hz, H-1'''), 3.72 (H-5''a), 3.44 (H-2''), 3.33 (H-2'''), 3.05 (H-5''b);  $^{13}\text{C}$  NMR (75 MHz, DMSO- $d_6$ )  $\delta$  177.43 (C-4), 171.46 (C-6''), 164.29 (C-7), 161.15 (C-5), 160.09 (C-4'), 160.03 (C-2), 156.28 (C-9), 132.68 (C-3), 131.02 (C-2', C-6'), 125.09 (C-1'), 115.20 (C-3', C-5'), 104.59 (C-1'''), 103.81 (C-10), 98.70 (C-6), 97.94 (C-1''), 93.69 (C-8), 81.60 (C-2''), 76.45\* (C-4''), 76.42\* (C-3''), 76.21\* (C-3'''), 74.36 (C-2'''), 73.27 (C-5''), 71.49 (C-4'''), 65.38 (C-5'''). \*overlapping shifts can be exchanged.

**Isorhamnetin-3-O- $\beta$ -glucuronoside (3'-O-methylquercetin 3-O- $\beta$ -glucuronoside; 14)**, data consistent with (Im et al., 2017). Yellow crystalline powder;  $^1\text{H}$  NMR (300 MHz, DMSO- $d_6$ )  $\delta$  8.21 (1H, d,  $J=2.0$  Hz, H-2'), 7.52 (1H, dd,  $J=8.1$ , 2.0 Hz, H-6'), 6.84 (1H, d,  $J=8.1$  Hz, H-5'), 6.41 (1H, d,  $J=2.0$  Hz, H-8), 6.19 (1H, d,  $J=2.0$  Hz, H-6) 5.38 (1H, d,  $J=7.6$  Hz, H-1''), 3.57 (3H, s, OCH $_3$ ), 3.59-3.44 (m, 4H, H-2'', 3'', 4'', 5'');  $^{13}\text{C}$  NMR (75 MHz, DMSO- $d_6$ )  $\delta$  176.72 (C-4), 168.88 (C-6''), 164.19 (C-7), 161.05 (C-5), 156.34 (C-9), 156.29 (C-2), 148.55 (C-4'), 144.76 (C-3'), 121.55 (C-6'), 120.81 (C-1'), 115.86 (C-2'), 114.96 (C-5'), 103.85 (C-10), 101.27 (C-1''), 98.74 (C-6), 93.4 (C-8), 75.44 (C-3''), 71.21 (C-4'').

**B. Supplementary Figures and Tables:**

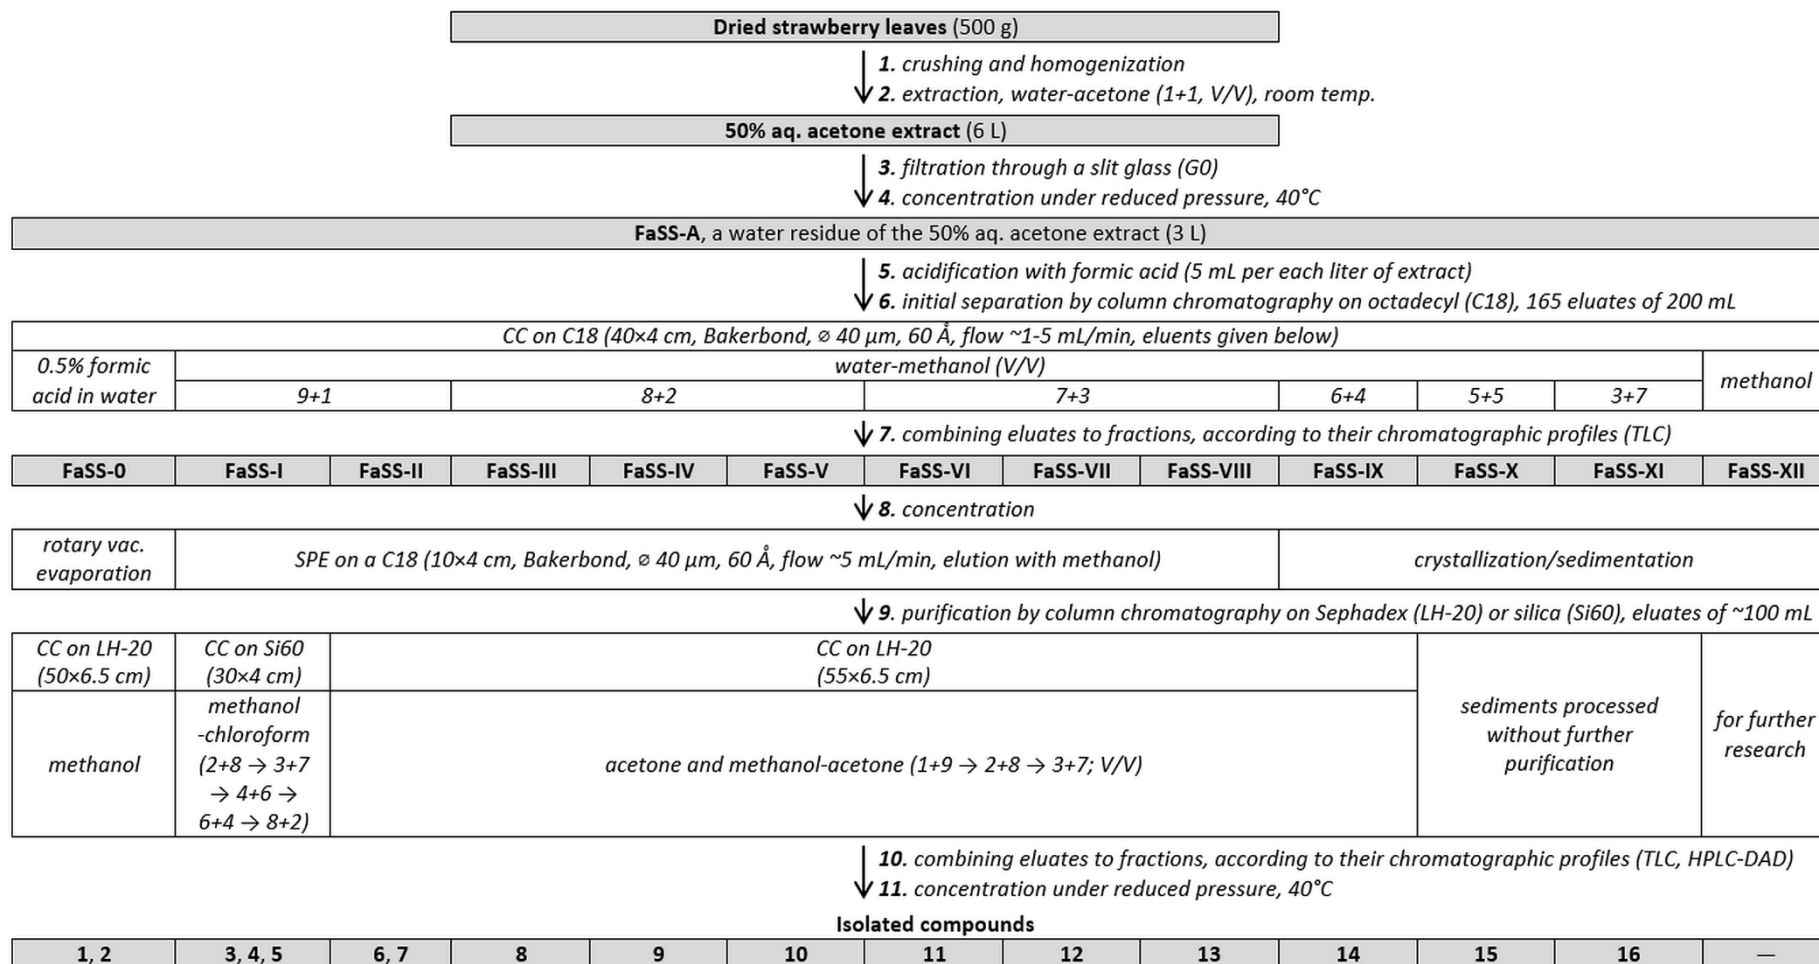

**Figure S1.** Scheme of extraction and isolation of individual polyphenols from *Fragaria × ananassa* cv. Senga Sengana leaves.

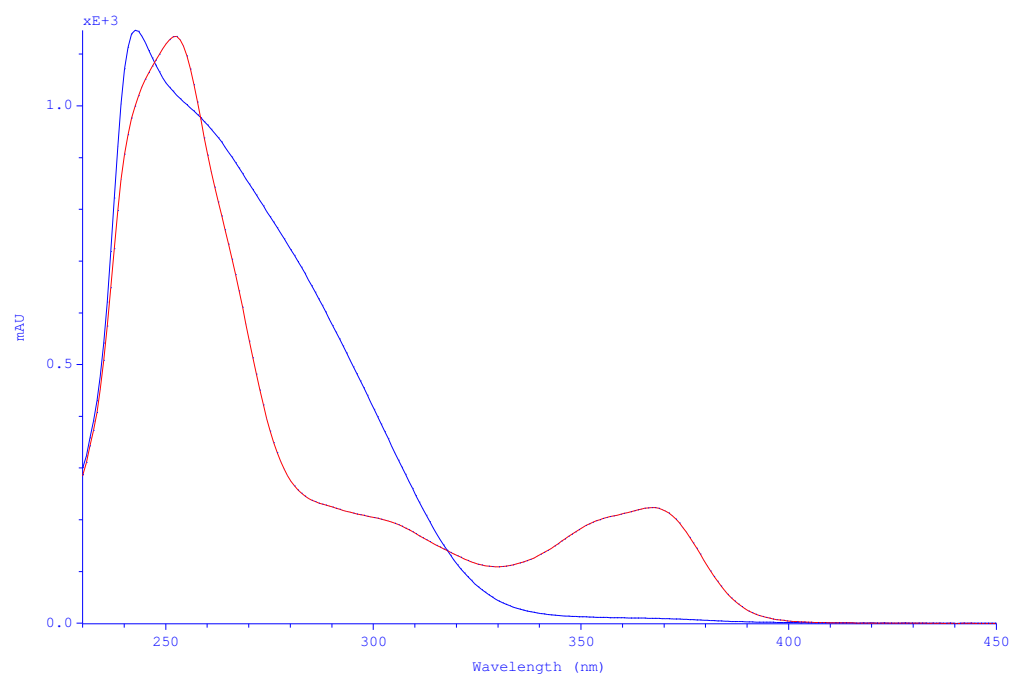

**Figure S2.** UV-VIS spectra of agrimoniin (10, blue line) and ellagic acid (16, red line).

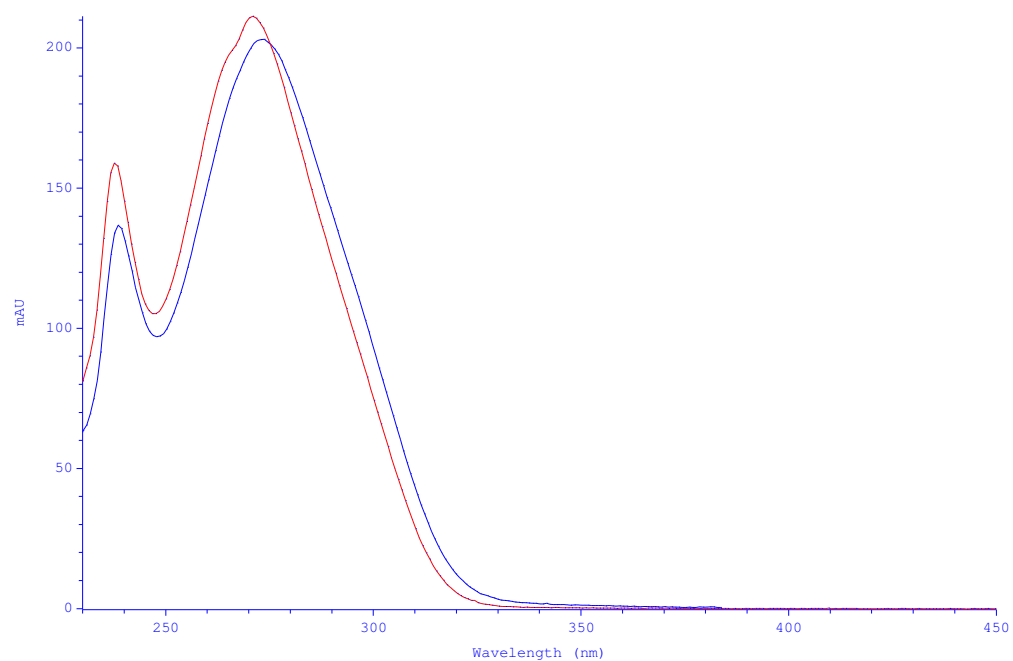

**Figure S3.** UV-VIS spectra of 5-O-galloylquinic acid (5, blue line) and gallic acid (red line).

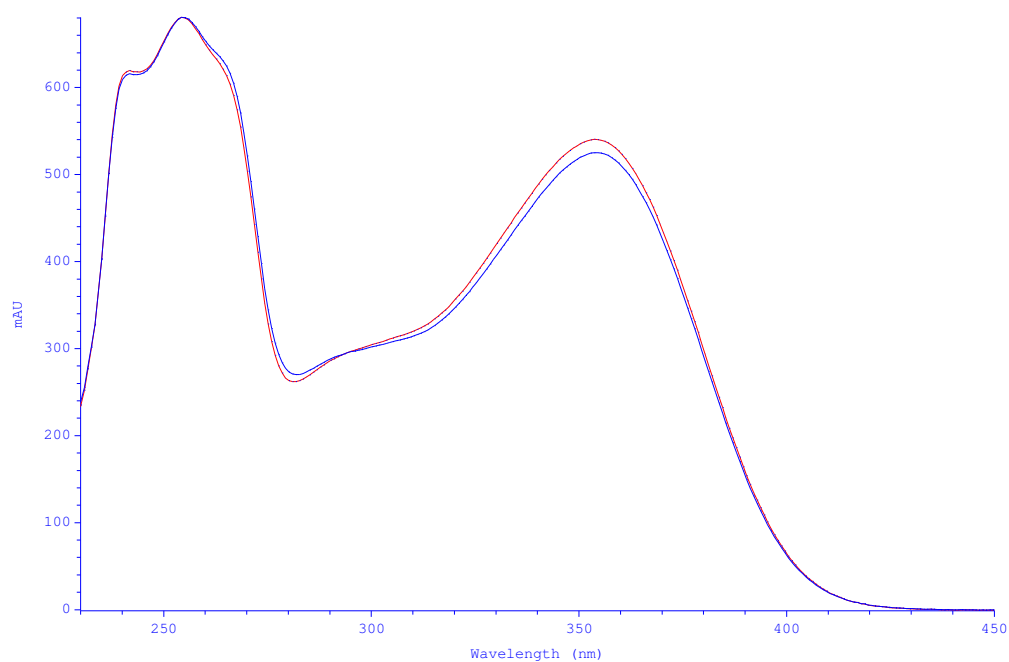

**Figure S4.** UV-VIS spectra of quercetin-3-*O*-[[ $\beta$ -xylosyl(1''' $\rightarrow$ 2'')]- $\beta$ -glucuronoside (**11**, blue line) and quercetin-3-*O*- $\beta$ -glucuronoside (**12**, red line).

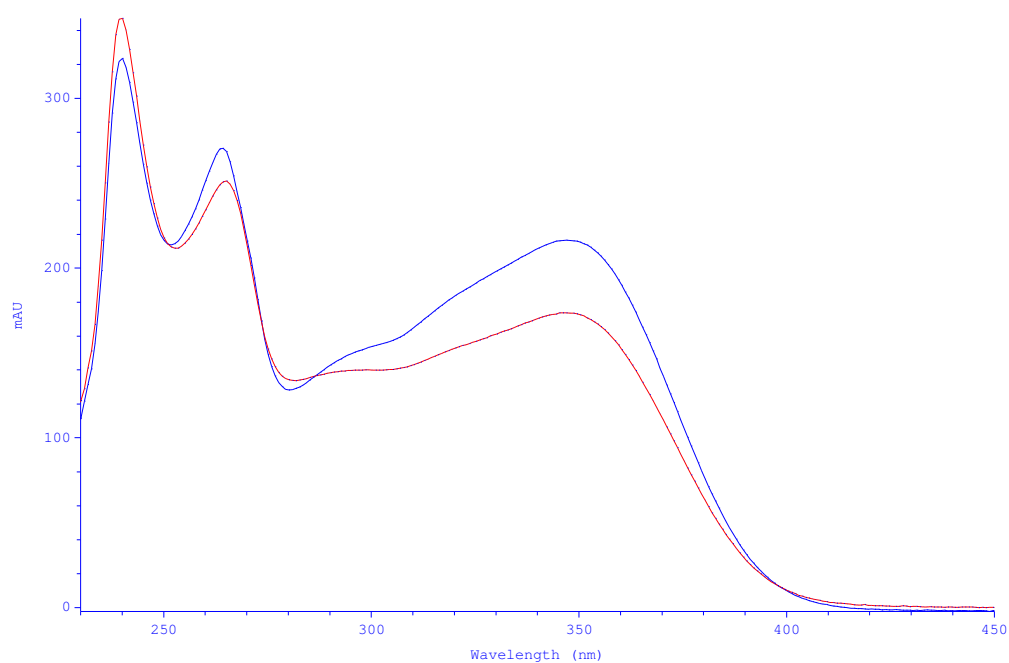

**Figure S5.** UV-VIS spectra of quercetin-3-*O*-[[ $\beta$ -xylosyl(1''' $\rightarrow$ 2'')]- $\beta$ -glucuronoside (**11**, blue line) and kaempferol-3-*O*-[[ $\beta$ -xylosyl(1''' $\rightarrow$ 2'')]- $\beta$ -glucuronoside (**13**, red line).

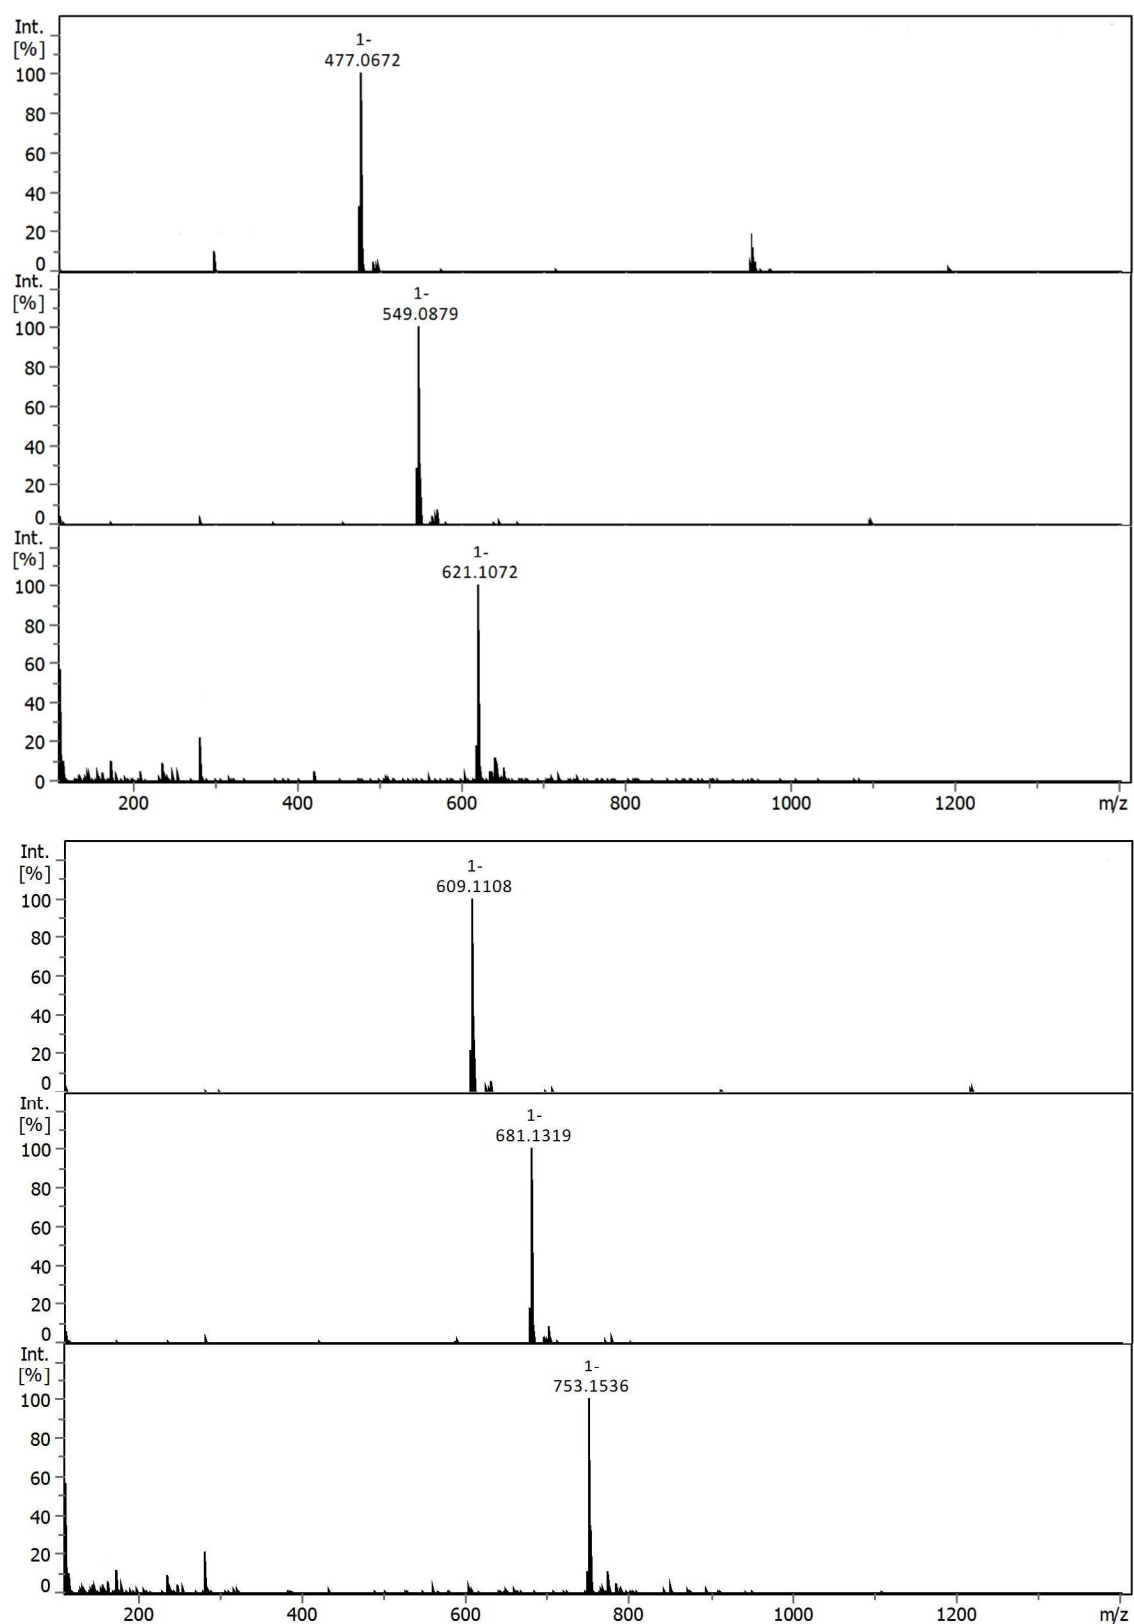

**Figure S6.** Methylglyoxal adducts with quercetin-3-*O*- $\beta$ -glucuronoside (above; **12**, miquelianin, Q3gr) and quercetin-3-*O*-[ $\beta$ -xylosyl(1" $\rightarrow$ 2")]- $\beta$ -glucuronoside (below; **11**, flagarin, Q3grx).

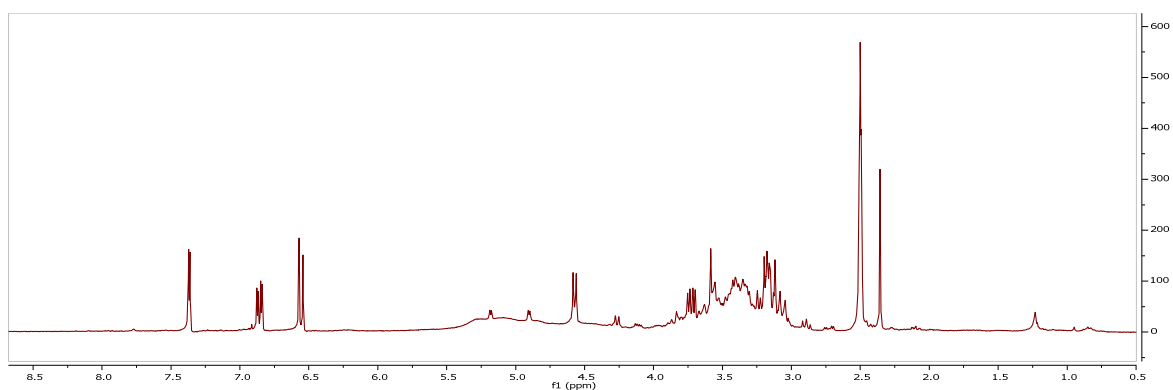

**Figure S7a.**  $^1\text{H}$  spectrum of protocatechuoyl xylose (**4a**); 300MHz, in  $\text{DMSO-}d_6$ .

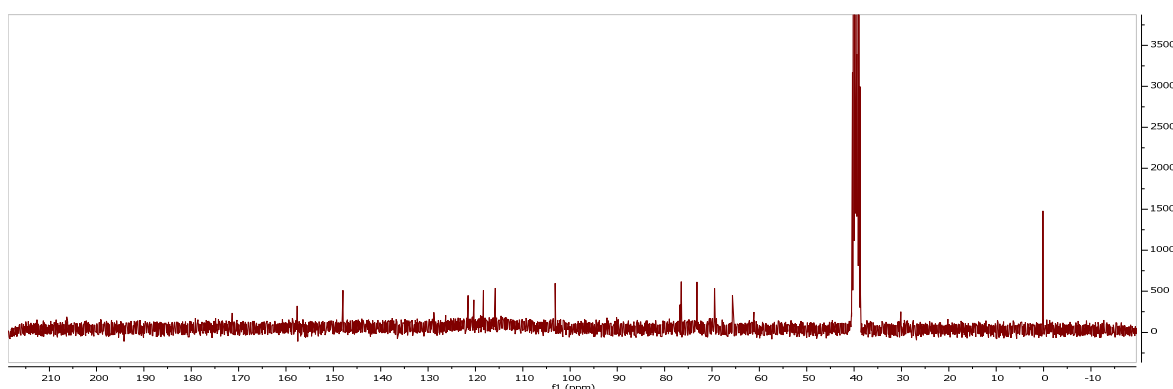

**Figure S7b.**  $^{13}\text{C}$  spectrum of protocatechuoyl xylose (**4a**); 75MHz, in  $\text{DMSO-}d_6$ .

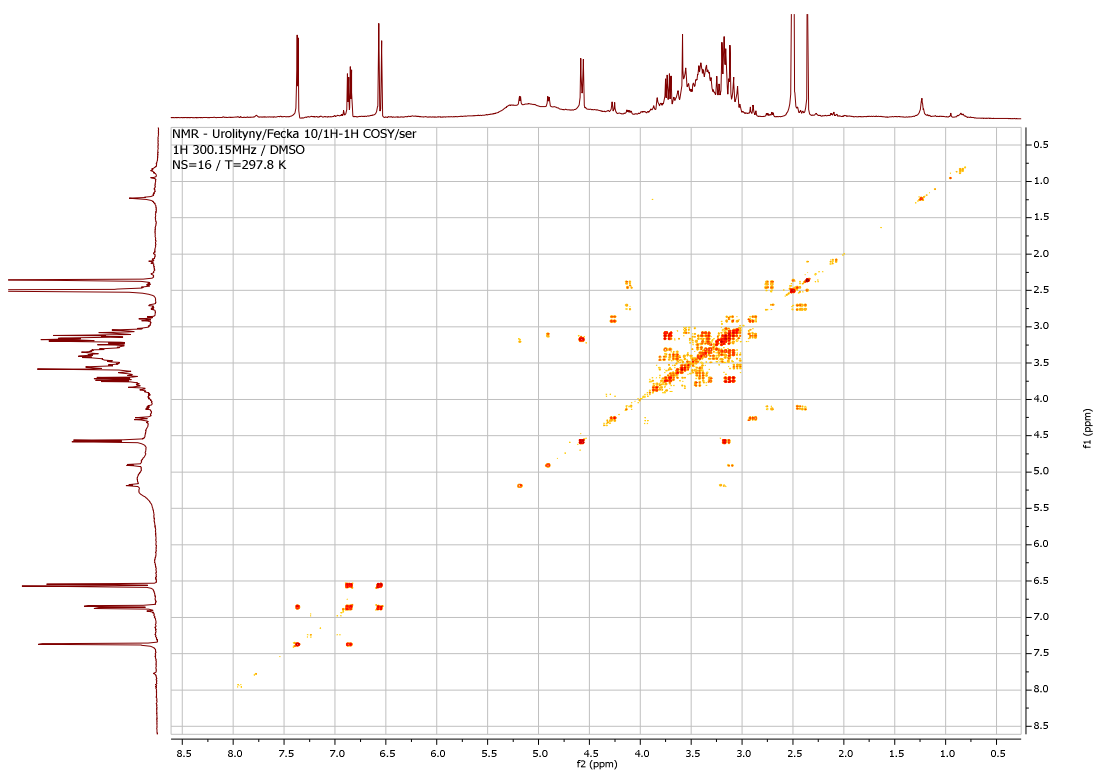

**Figure S7c.**  $^1\text{H-}^1\text{H}$  COSY spectrum of protocatechuoyl xylose (**4a**); 300MHz, in  $\text{DMSO-}d_6$ .

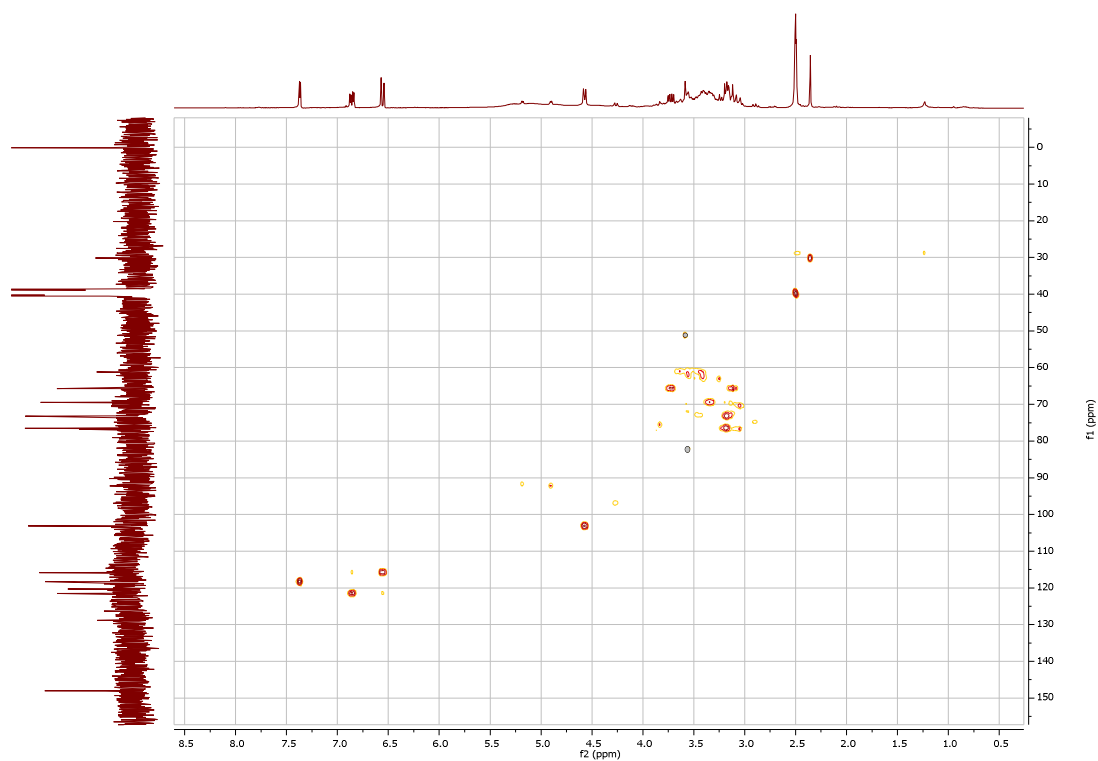

**Figure S7d.**  $^1\text{H}$ - $^{13}\text{C}$  HSQC spectrum of protocatechuoyl xylose (**4a**) ( $\text{DMSO-}d_6$ ).

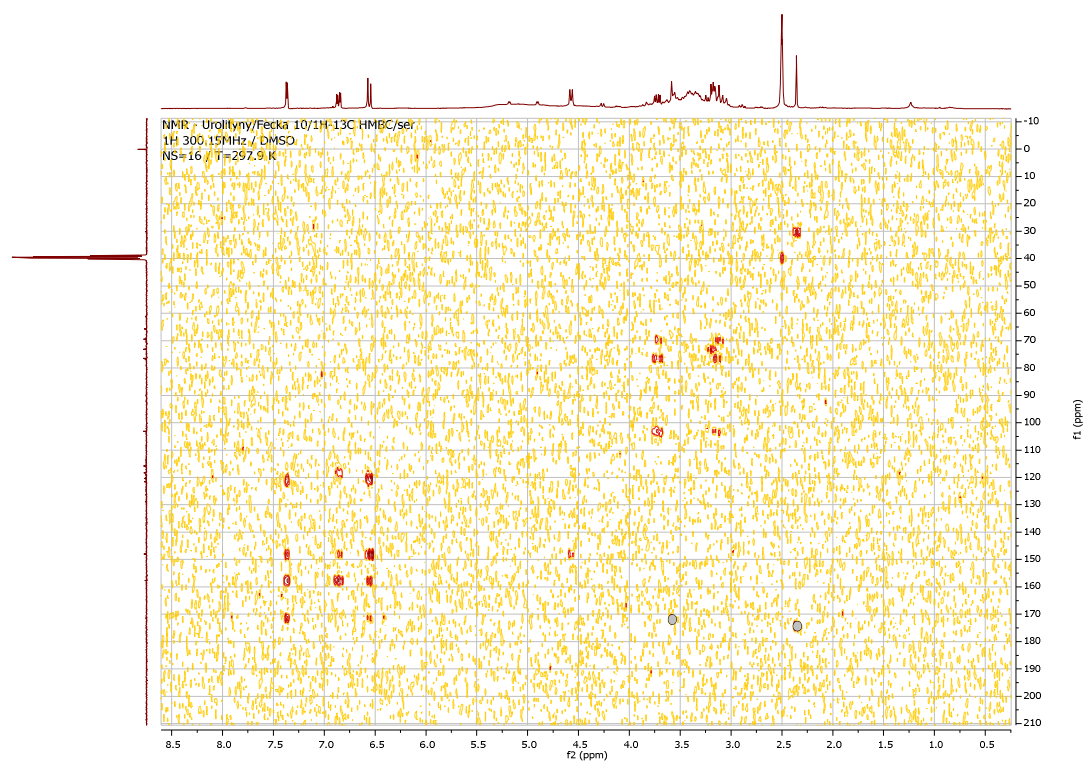

**Figure S7e.**  $^1\text{H}$ - $^{13}\text{C}$  HMBC spectrum of protocatechuoyl xylose (**4a**) ( $\text{DMSO-}d_6$ ).



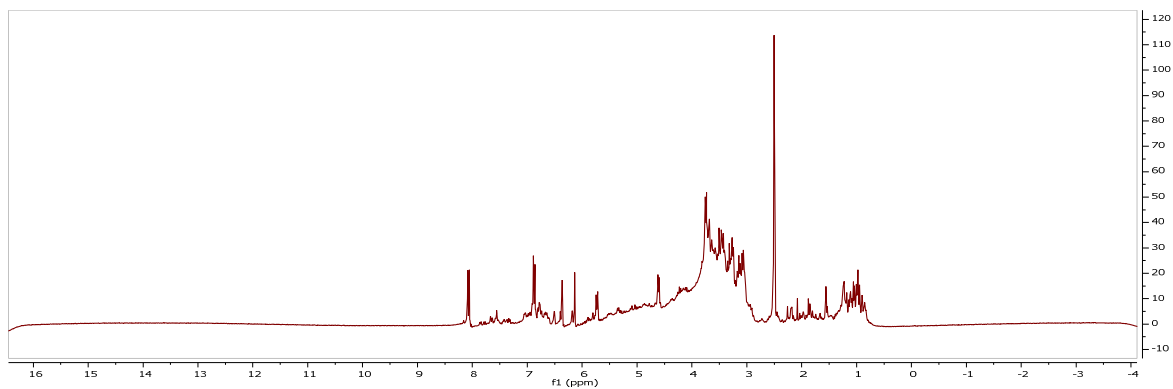

**Figure S8a.**  $^1\text{H}$  spectrum of kaempferol-3-O- $[\beta\text{-xylosyl}(1'''\rightarrow 2'')]\text{-}\beta\text{-glucuronoside}$  (**13**); 300MHz, in  $\text{DMSO-}d_6$ .

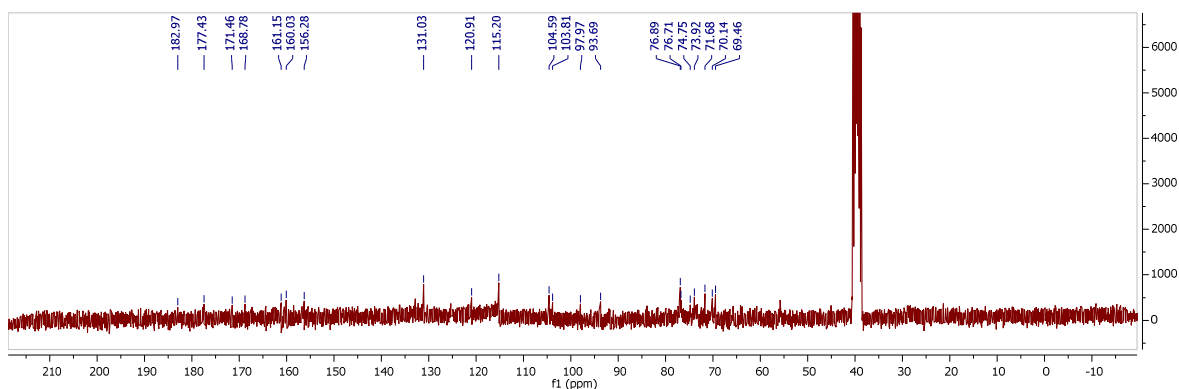

**Figure S8b.**  $^{13}\text{C}$  spectrum of kaempferol-3-O- $[\beta\text{-xylosyl}(1'''\rightarrow 2'')]\text{-}\beta\text{-glucuronoside}$  (**13**); 75MHz, in  $\text{DMSO-}d_6$ .

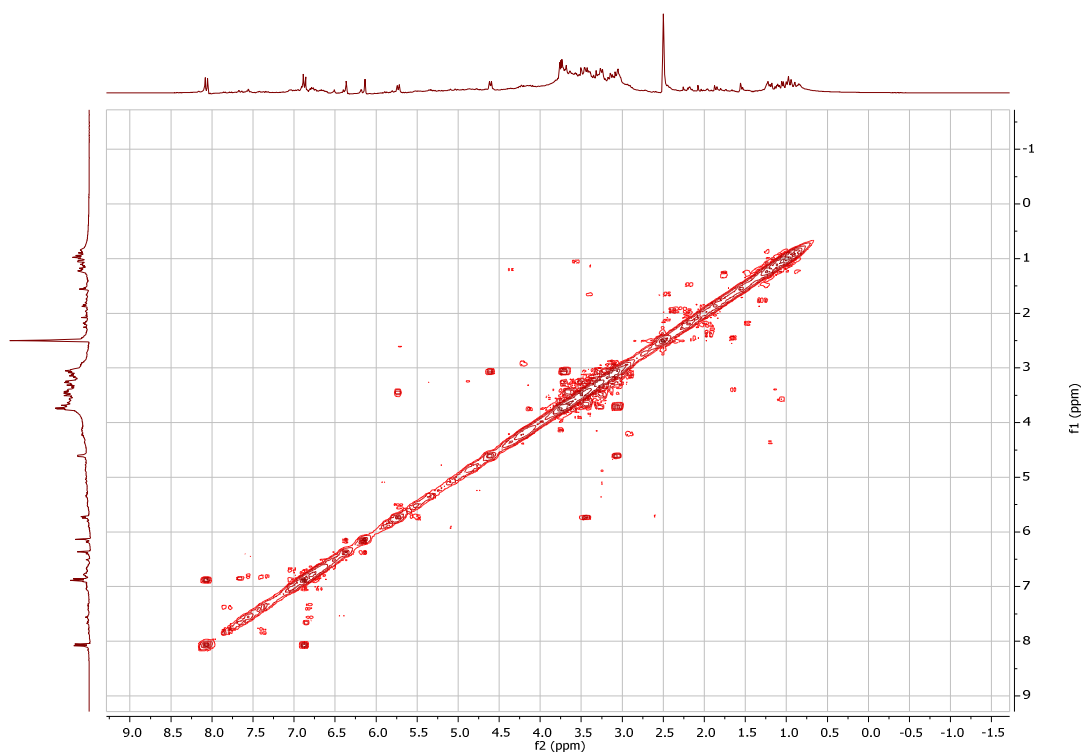

**Figure S8c.**  $^1\text{H}$ - $^1\text{H}$  COSY spectrum of kaempferol-3-O- $[\beta\text{-xylosyl}(1'''\rightarrow 2'')]\text{-}\beta\text{-glucuronoside}$  (**13**); 300MHz, in  $\text{DMSO-}d_6$ .

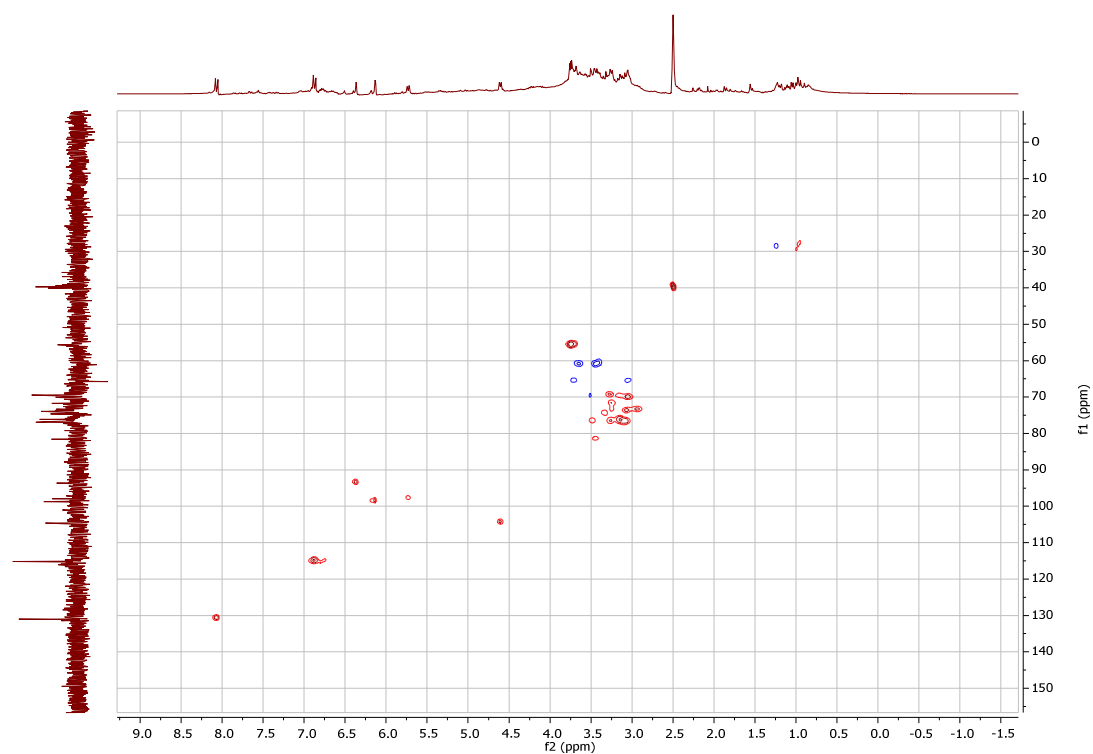

**Figure S8d.**  $^1\text{H}$ - $^{13}\text{C}$  HSQC spectrum of kaempferol-3-O-[ $\beta$ -xylosyl(1" $\rightarrow$ 2")]- $\beta$ -glucuronoside (**13**) (DMSO- $d_6$ ).

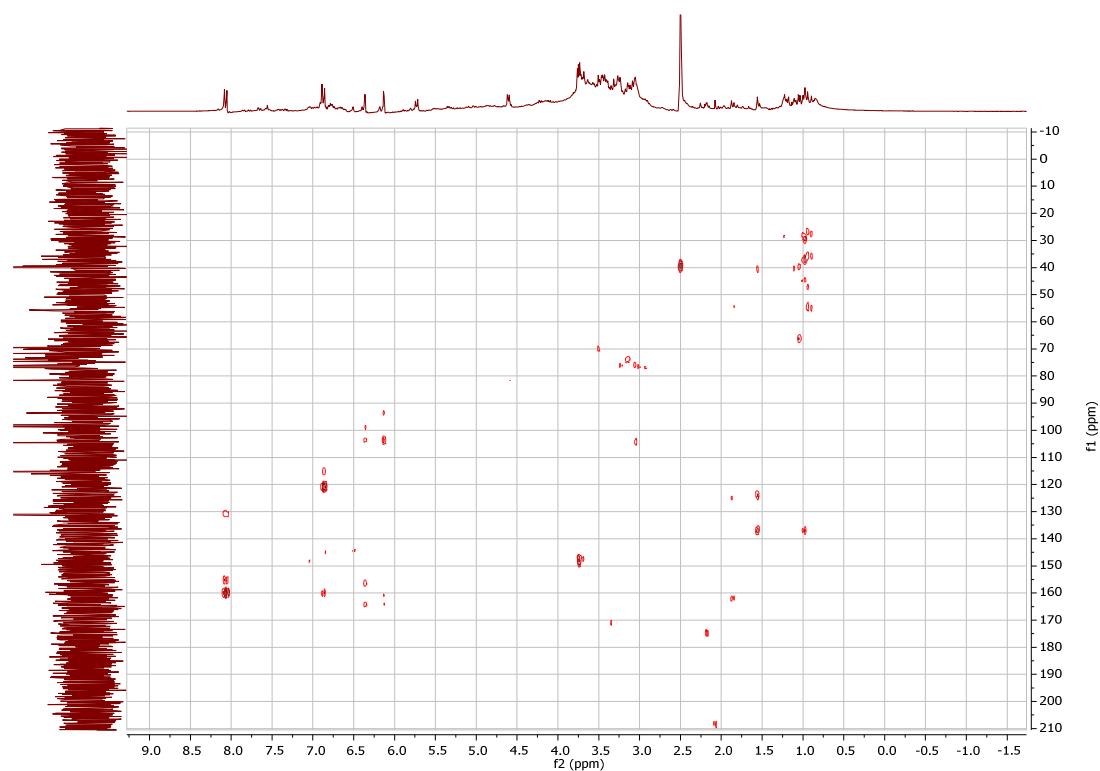

**Figure S8e.**  $^1\text{H}$ - $^{13}\text{C}$  HMBC spectrum of kaempferol-3-O-[ $\beta$ -xylosyl(1" $\rightarrow$ 2")]- $\beta$ -glucuronoside (**13**) (DMSO- $d_6$ ).

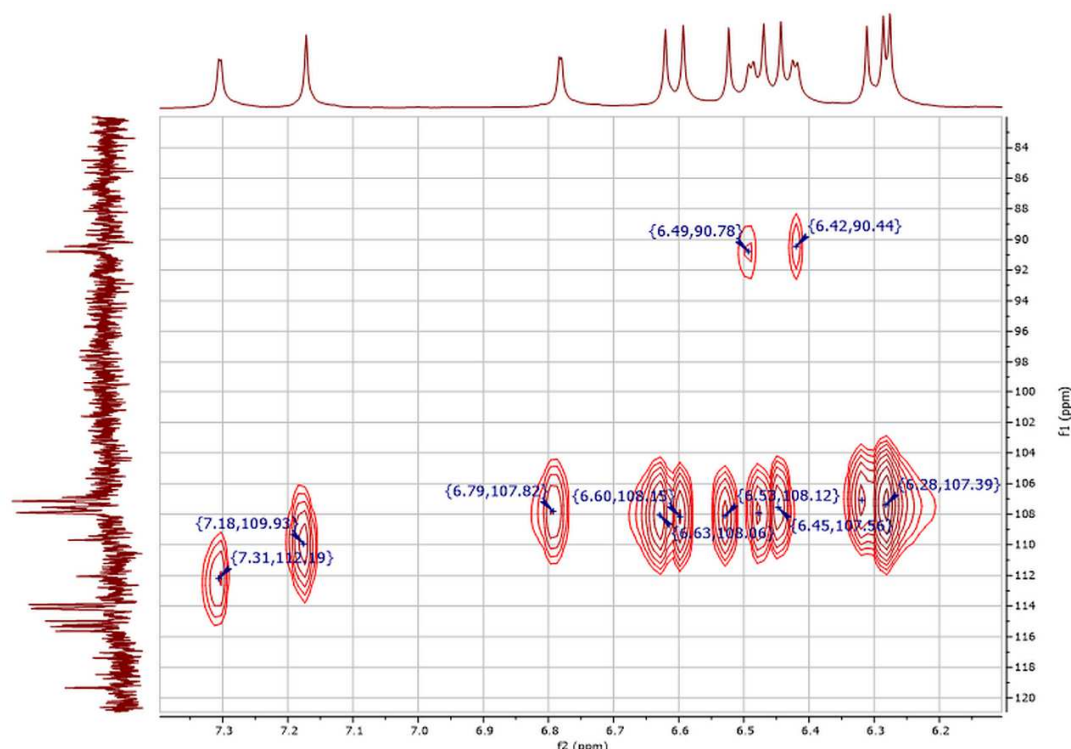

**Figure S9.** A detail of aromatic region of  $^1\text{H}$ - $^{13}\text{C}$  HSQC spectrum of agrimoniin (**10**); 500MHz, in equivolumetric mixture of acetone- $d_6$  and  $\text{D}_2\text{O}$ )

**Table S1.** The antiglycation activity of selected flavonols and known inhibitors ( $n = 3$ ). *Abbreviations:* **Ag**, aminoguanidine (reference); **M**, metformin (reference); **Q**, quercetin (reference); **Q3g**, quercetin-3- $O$ - $\beta$ -glucoside (*isoquercitrin*; minor FaSS extracts constituent); **Q4'g**, quercetin-4'- $O$ - $\beta$ -glucoside (*spireoside*; reference); **Q3ga**, quercetin-3- $O$ - $\beta$ -galactoside (*hyperoside*; reference); **Q3gr**, quercetin-3- $O$ - $\beta$ -glucuronoside (*miquelianin*; **12**); **Q3grx**, quercetin-3- $O$ -[ $\beta$ -xylosyl(1" $\rightarrow$ 2")]- $\beta$ -glucuronoside (*flagarin*; **11**).

| Compound            | % inhibition | SD    | ANOVA |
|---------------------|--------------|-------|-------|
| Ag                  | <b>74.81</b> | 2.16  | a     |
| M                   | 52.28        | 13.82 | bd    |
| Q                   | <b>77.16</b> | 10.05 | a     |
| Q3g                 | <b>74.91</b> | 1.64  | a     |
| Q4'g                | 63.93        | 3.58  | c     |
| Q3ga                | <b>77.97</b> | 0.75  | a     |
| Q3gr ( <b>12</b> )  | <b>71.56</b> | 5.80  | abc   |
| Q3grx ( <b>11</b> ) | 44.82        | 3.23  | d     |

Values not sharing a common letter are significantly different at  $P < 0.05$  by Tukey's multiple comparisons test.
